# Supplementary material
Source: publisher site journal article supplement (https://www.spandidos-publications.com/663/downloadSupplementary)

Figure S1. Study overview. The flowchart describes the construction and testing of serum-based and urine-based predictive peptide models for SCLC. SCLC, small cell lung cancer; MALDI-TOF MS, matrix-assisted laser desorption/ionization time-of-flight mass spectrometry.

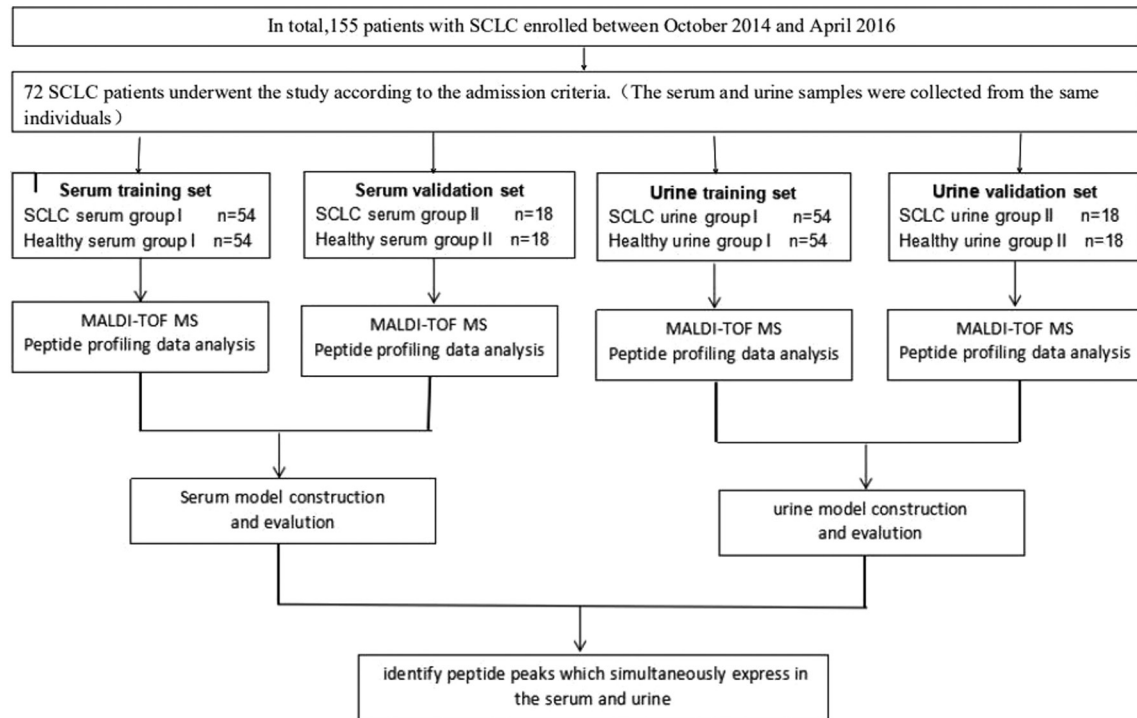

Supplement: Supplementary file 1 [file downloadSupplementary]
